# Supplementary material for: Sexuelle und geschlechtliche Vielfalt in der Altenpflege
Source: Springer Nature journal article supplement (doi:10.1007/s00058-020-1494-x), 2020-04-22
Supplement: MOESM1 [file 17920652]

# Literaturliste

## Zum Beitrag „Sexuelle und geschlechtliche Vielfalt in der Altenpflege“ von Ralf Lottmann

Heilberufe 5/2020, Seite 40

### Literatur

- Appenroth, Max Nicolai & Lottmann, Ralf (2019): Altern Trans Anders? Empirische Befunde internationaler Untersuchungen zu Trans Identitäten und Alter(n). In: Appenroth, M. N. & Castro Varela, M.d.M. (Hg.): Trans & Care: Trans Personen zwischen Selbstsorge, Fürsorge und Versorgung. Transcript, 287-302
- Auth D.; Discher, K.; Kaiser P.; Leiber, S.; Leitner, S. (2018): Sorgende Angehörige als Adressat\_innen einer vorbeugenden Pflegepolitik. Eine intersektionale Analyse. FGW – Forschungsinstitut für gesellschaftliche Weiterentwicklung e.V. Düsseldorf
- Bochow, M. (2005): Ich bin doch schwul und will das immer bleiben. Männerschwarm, Hamburg
- Brauckmann, C. & Schmauch, U. (2007): Lesbische Frauen im Alter – ihre Lebenssituation und ihre spezifischen Bedürfnisse für ein altengerechtes Leben. Forschungsbericht des gFFZ, Frankfurt/M.
- Brennan-Ing, M./Seidel, L./Larson, B./Karpiak, S. E. (2014): Social Care Networks and Older LGBT Adults: Challenges for the Future. In: Journal of Homosexuality 61(1), 21-52
- Castro Varela, MdM. & Lottmann, R. (2018): Altenpflege – die letzte weiße deutsche heterosexuelle Bastion? Eine Vielfaltskritik. In: Deutscher Verein für öffentliche und private Fürsorge e.V. (Hrsg). Vielfalt und Zusammenhalt: zwei Konzepte auf dem Prüfstand. Archiv für Wissenschaft und Praxis der sozialen Arbeit 2, S 80-89
- Cronin, A. & King, A. (2012): Only connect? Older lesbian, gay and bisexual (LGB) adults and social capital. Ageing and Society, 34(2):258-279
- Elder, A. B. (2016): Experiences of Older Transgender and Gender Nonconforming Adults in Psychotherapy: A Qualitativ Study. Psychology of Sexual Orientation and Gender Diversity, 3(2):180-186
- Fredriksen-Goldsen, K. I.; Kim, H.-J.; Barkan, S. E.; Muraco, A.; Hoy-Ellis, C. P. (2013); Health Disparities Among Lesbian, Gay, and Bisexual Older Adults: Results from a Population-Based Study. American Journal of Public Health 103(10):1802-1809
- Gerlach, H. & Schupp, M. (2018): Homosexualitäten in der Langzeitpflege. Eine Theorie der Anerkennung. Peter Lang Verlag. Berlin.
- Gerlach, H. & Szillat, C. (2017): Schwule im Alter. Studie zur Lebenssituation von männerliebenden Männern über 50 in Hamburg. VS, Wiesbaden
- Heaphy, B./Yip, A. K. T./Thompson, D. (2004): Ageing in a Non-heterosexual Context. In: Ageing & Society 24, 881-002
- Kenel, P., Gather, C., Lottmann, R. (2018): „Das war noch nie Thema hier, noch nie!“ Sexuelle Vielfalt in der Altenpflege – Perspektiven für ein Diversity Management. In: Pflege & Gesellschaft 23(3):211-227
- King, A. (2016): Older Lesbian, Gay and Bisexual Adults: Identities, Intersections and Institutions. Ashgate, Farnham
- Kitwood, T. (2000): Der personenzentrierte Ansatz im Umgang mit verwirrten Menschen. Bern: Huber.
- Lautmann, Rüdiger (2016): Die soziokulturelle Lebensqualität von Lesben und Schwulen im Alter. In: Lottmann R, Lautmann, Castro Varela, MdM (Hrsg): Homosexualität\_en und Alter(n), VS, Wiesbaden, S 15–50
- Lautmann, Rüdiger (2012): Eine Lebenswelt im Schatten der Kriminalisierung – der Homosexuellenparagrah als Kollektivschädigung. In: LADS (Hg.), § 175 StGB – Rehabilitation der nach 1945 verurteilten homosexuellen Männer. Berlin, S. 71–93

- Linschoten, M., Lottmann, R., & Lauscher, F. (2016). »The Pink Passkey®« – ein Zertifikat für die Verbesserung der Akzeptanz von LSBT\*I-Pflegebedürftigen in Pflegeeinrichtungen. In R. Lottmann, R. Lautmann, & M.d.M. Castro Varela (Hrsg.), *Homosexualität\_en und Alter(n)* (pp. 233–241). Wiesbaden: VS Verlag.
- Lottmann, Ralf (2020): Sexuelle und geschlechtliche Vielfalt in der Altenhilfe – Intersektionale Perspektiven und die Relevanz von Situationen und Kontexten. *Zeitschrift für Gerontologie und Geriatrie*, SEITEN?? <https://doi.org/10.1007/s00391-020-01704-7>
- Lottmann, Ralf (2018): LSBT\*I-Senior\*innen in der Pflege (2018): Zu Relevanz und Besonderheiten sozialer Netzwerke und der Arbeit mit Angehörigen. In: *Pflege & Gesellschaft* 23(3), 228-244
- Lottmann, Ralf & King, Andrew (2020): Who Can I Turn To? Social Networks and the Housing, Care and Support Preferences of Older Lesbian and Gay People in the UK, findings from the SAFE study. In: *Sexualities* (im Druck)
- Lottmann, Ralf & Kollak, Ingrid (2018): Eine diversitätssensible Pflege für schwule und lesbische Pflegebedürftige – Ergebnisse des Forschungsprojekts GLESA. In: *International Journal of Health Professions*, 5(1): 53–63, DOI: 10.2478/ijhp-2018-0005
- Richard, C. A, Brown, A. H. (2006): Configurations of Informal Social Support Among Older Lesbians. In: *Journal of Women & Aging* 18(4):49-65
- Stinchcombe, Arne; Smallbone, Jeffrey; Wilson, Kimberley; Kortess-Miller, Katherine (2017): Healthcare and End-of-Life Needs of Lesbian, Gay, Bisexual, and Transgender (LGBT) Older Adults: A Scoping Review. *Geriatrics*, 2(13), 1-13
- Wallace, S. P.; Cochran, S. D.; Durazo, E. M.; Ford, C. L. (2011): *The Health of Aging Lesbian, Gay and Bisexual Adults in California*. Los Angeles: UCLA Center for Health Policy Research
- Westwood S. (2016): 'We see it as being heterosexualised, being put into a care home': gender, sexuality and housing/care preferences among older LGB individuals in the UK. *Health Soc Care Community*, 24:155–163
